# Supplementary material for: Investigation of structure and photocatalytic activity on TiO2 hybridized with graphene: compared to CNT case
Source: Royal Society of Chemistry journal article supplement (doi:10.1039/c5ra09773h), 2015-01-01
Supplement: c5ra09773h1.pdf [file c5ra09773h1.pdf]

## Supplementary Information

### Investigation of Structure and Photocatalytic Activity on TiO<sub>2</sub> Hybridized with graphene: Compared to CNT Case

ShuaiNan Guo, JinChen Fan<sup>1</sup>, QunJie Xu<sup>2</sup>, YuLin Min<sup>3</sup>

(Shanghai Key Laboratory of Materials Protection and Advanced Materials in Electric Power,  
College of Environmental and Chemical Engineering, Shanghai University of Electric Power,  
200090)

---

<sup>1</sup>Corresponding Author: JinChen Fan(Email: [jinchen.fan@gmail.com](mailto:jinchen.fan@gmail.com));

<sup>2</sup> Corresponding Author: QunJie Xu(Email: [xuqunjie@shiep.edu.cn](mailto:xuqunjie@shiep.edu.cn));

<sup>3</sup>Corresponding Author: YuLin Min(Email: [ahaqmylin@126.com](mailto:ahaqmylin@126.com))

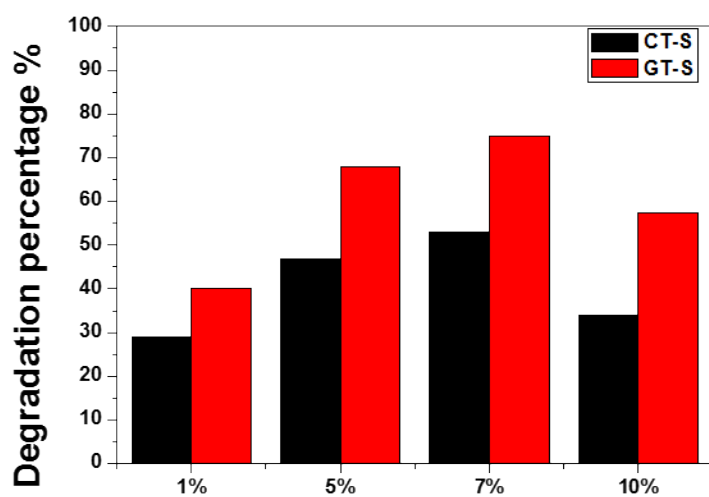

Fig S1. The degradation efficiencies of Rh.B over the CT-S and GT-S composites with different CNTs or Gr content under visible light.

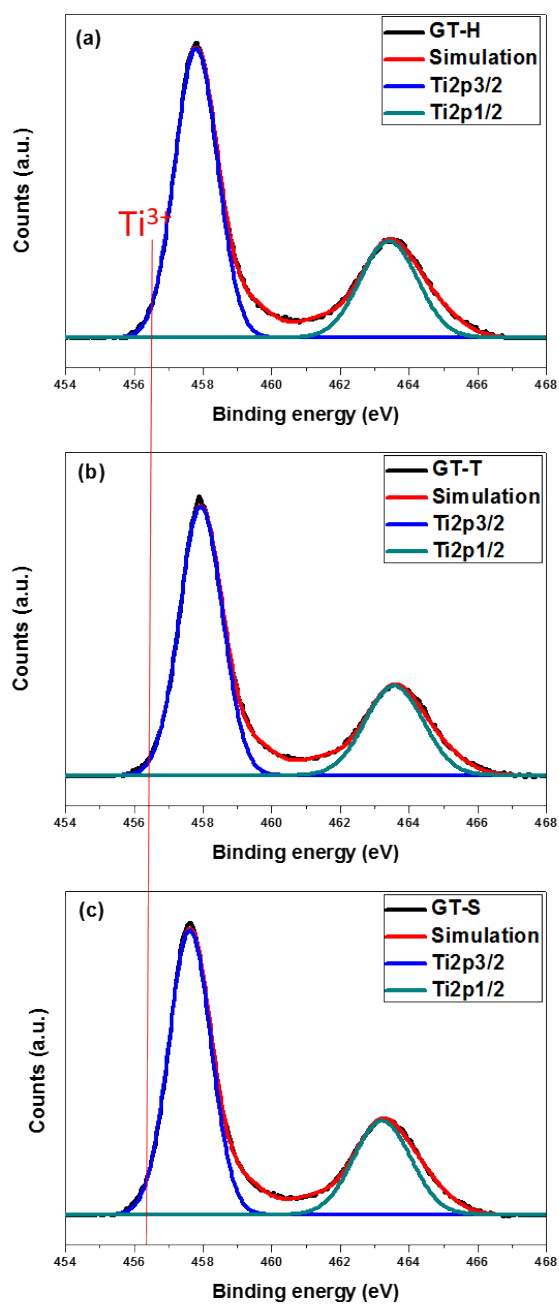

Fig. S2. The high resolution Ti2p XPS spectra for various GT composites.

The XRD pattern of GO showed a strong and sharp diffraction peak at  $2\theta$  of  $10.6^\circ$  (Figure 7), corresponding to a d-spacing of  $\sim 8.4$  Å. This is in agreement with the lamellar structure of GO. For the

RGO obtained from the hydrothermal reduction, this diffraction peak disappeared and a very broad peak at  $2\theta$  of  $\sim 25^\circ$  (corresponding to a d-spacing of  $3.6 \text{ \AA}$ ) was observed, suggesting the reduction of GO to grapheme sheets.

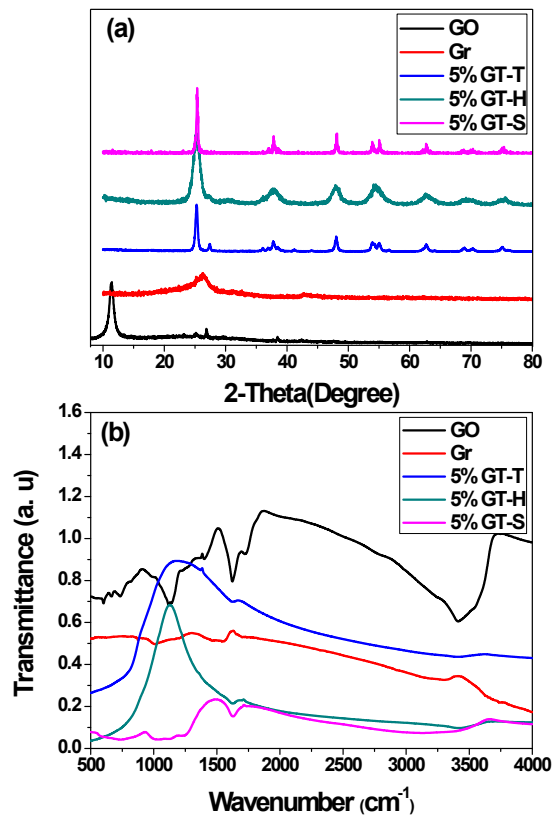

Fig. S3. The XRD patterns (a) and FT-IR spectra of GO, Gr, and various GT with 5% graphene content.
